# Supplementary material
Source: Springer Nature journal article supplement (https://www.springermedizin.de/resource/supplementary/13020_2013_219_MOESM8_ESM.pdf/9641234)

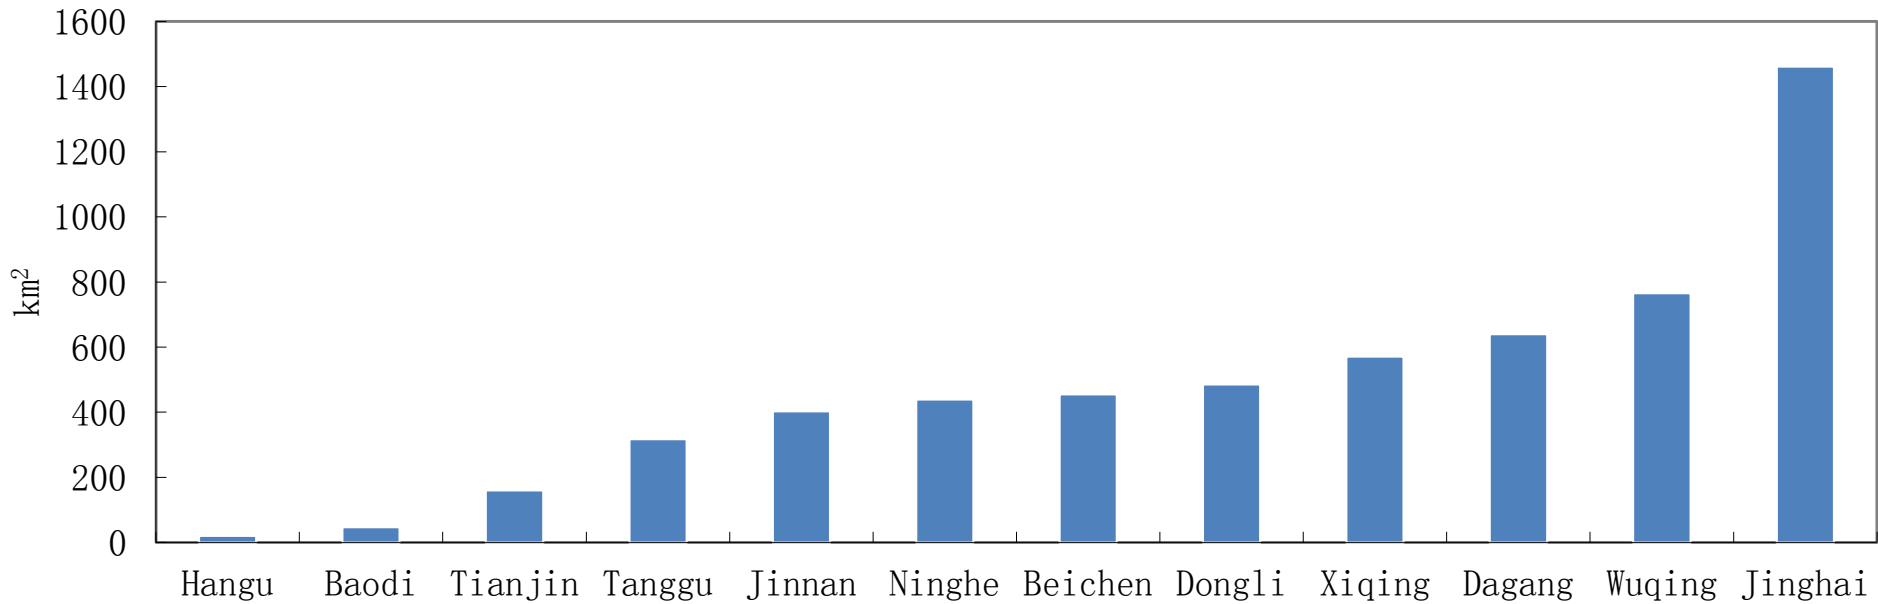

Supplement: MOESM8 [file 9641234]
